# Supplementary material for: Thiocyanate-free cyclometalated ruthenium sensitizers for solar cells based on heteroaromatic-substituted 2-arylpyridines
Source: Royal Society of Chemistry journal article supplement (doi:10.1039/c2dt31551c), 2012-01-01
Supplement: c2dt31551c.pdf [file c2dt31551c.pdf]

## **Thiocyanate-free cyclometalated ruthenium sensitizers for solar cells based on heteroaromatic-substituted 2-arylpyridines**

*Alessandro Abbotto,<sup>\*a,c</sup> Elisa Dell'Orto,<sup>a</sup> Carmine Coluccini,<sup>a</sup> Norberto Manfredi,<sup>a</sup> Vanira Trifiletti,<sup>a</sup> Matteo M. Salamone,<sup>a</sup> Riccardo Ruffo,<sup>a</sup> Maurizio Acciarri,<sup>a</sup> Alessia Colombo,<sup>b</sup> Claudia Dragonetti,<sup>b</sup> Stefania Ordanini,<sup>b</sup> Dominique Roberto,<sup>\*b,c</sup> and Adriana Valore<sup>c</sup>*

### **Electronic Supplementary Information**

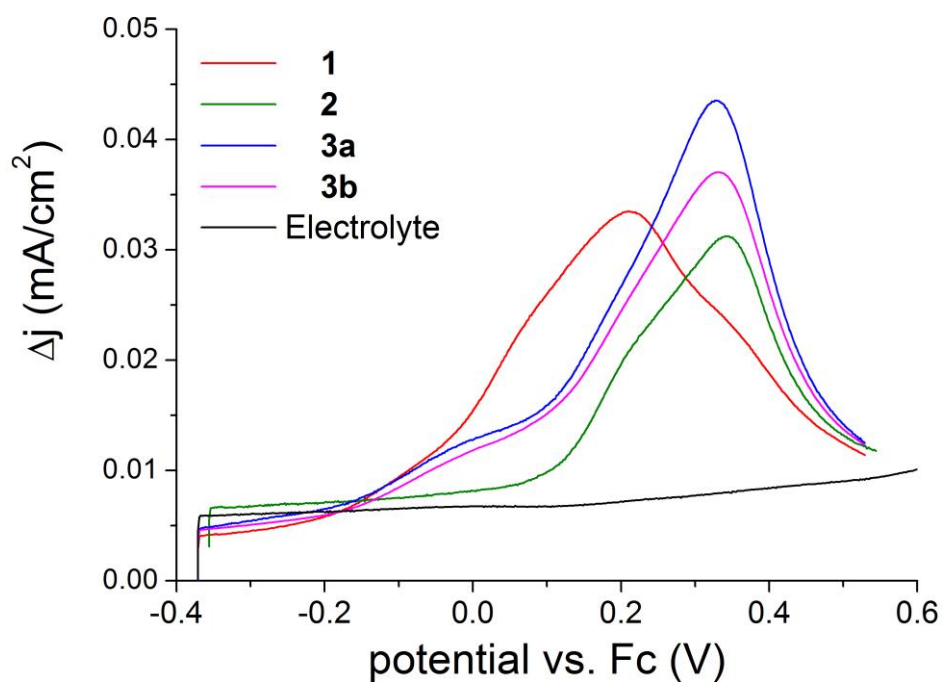

**Fig. S1** Oxidative DPV profiles of complexes in 0.1 M TBAClO<sub>4</sub> in DMF at 20 mV/s.

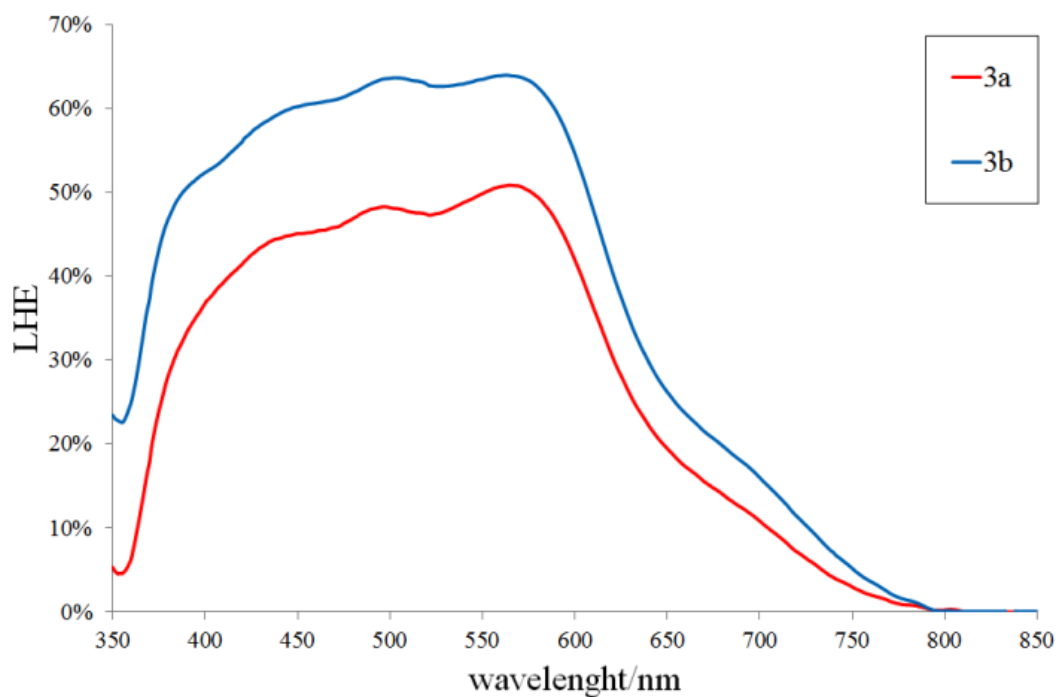

**Fig. S2** LHE as a function of wavelength for cyclometalated Ru(II) sensitizers **3a** and **3b** (9- $\mu$ m nanocrystalline TiO<sub>2</sub> monolayer).

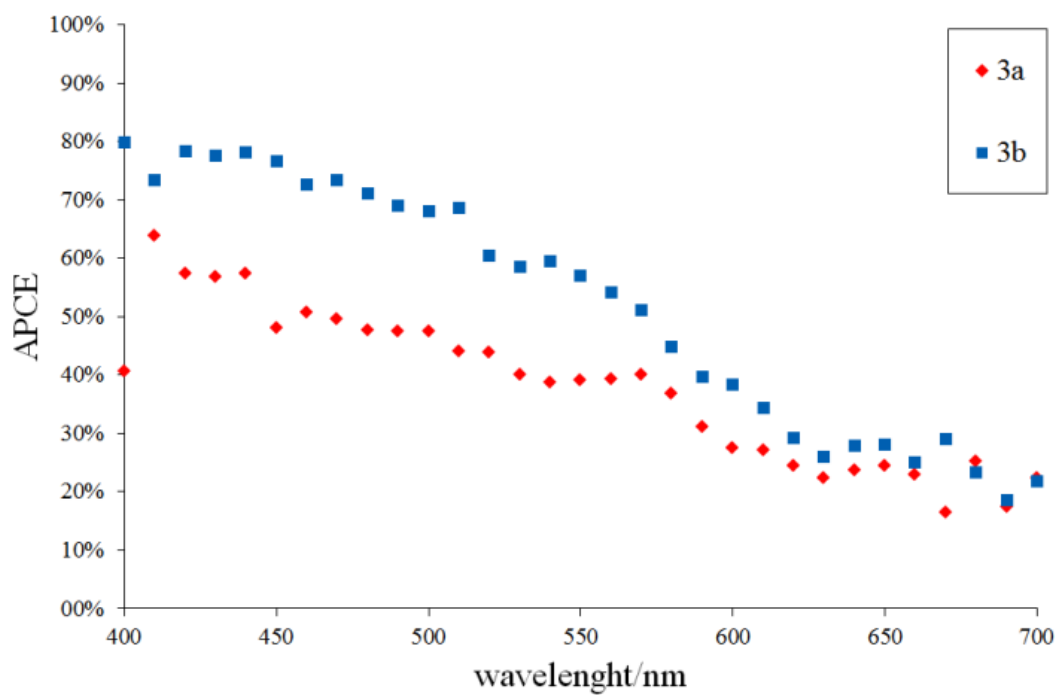

**Fig. S3.** APCE of DSCs using cyclometalated Ru(II) sensitizers 3a and 3b (9- $\mu\text{m}$  nanocrystalline TiO<sub>2</sub> monolayer).
